# Supplementary material for: ADAM17 and EGFR regulate IL‐6 receptor and amphiregulin mRNA expression and release in cigarette smoke‐exposed primary bronchial epithelial cells from patients with chronic obstructive pulmonary disease (COPD)
Source: PubMed Central journal article supplement (PMC5002905; doi:10.14814/phy2.12878), 2016-08-25

## Supplementary Figure S2.

**Lateral EGFR in ALI-PBEC, internalized after CS treatment.** ALI-PBEC cultured under basal conditions, including (EGF and PBE) were treated with air or CS as described in the methods section. **A:** lateral EGFR immune fluorescence signal (green) becomes more diffuse three hours after CS treatment **B:** Lateral E-cadherin (red) illustrates the partial cytoplasmic localisation of EGFR. **C:** This is confirmed in a separate experiment, after 10 minutes exposure to air or CS, with three separate filters each.

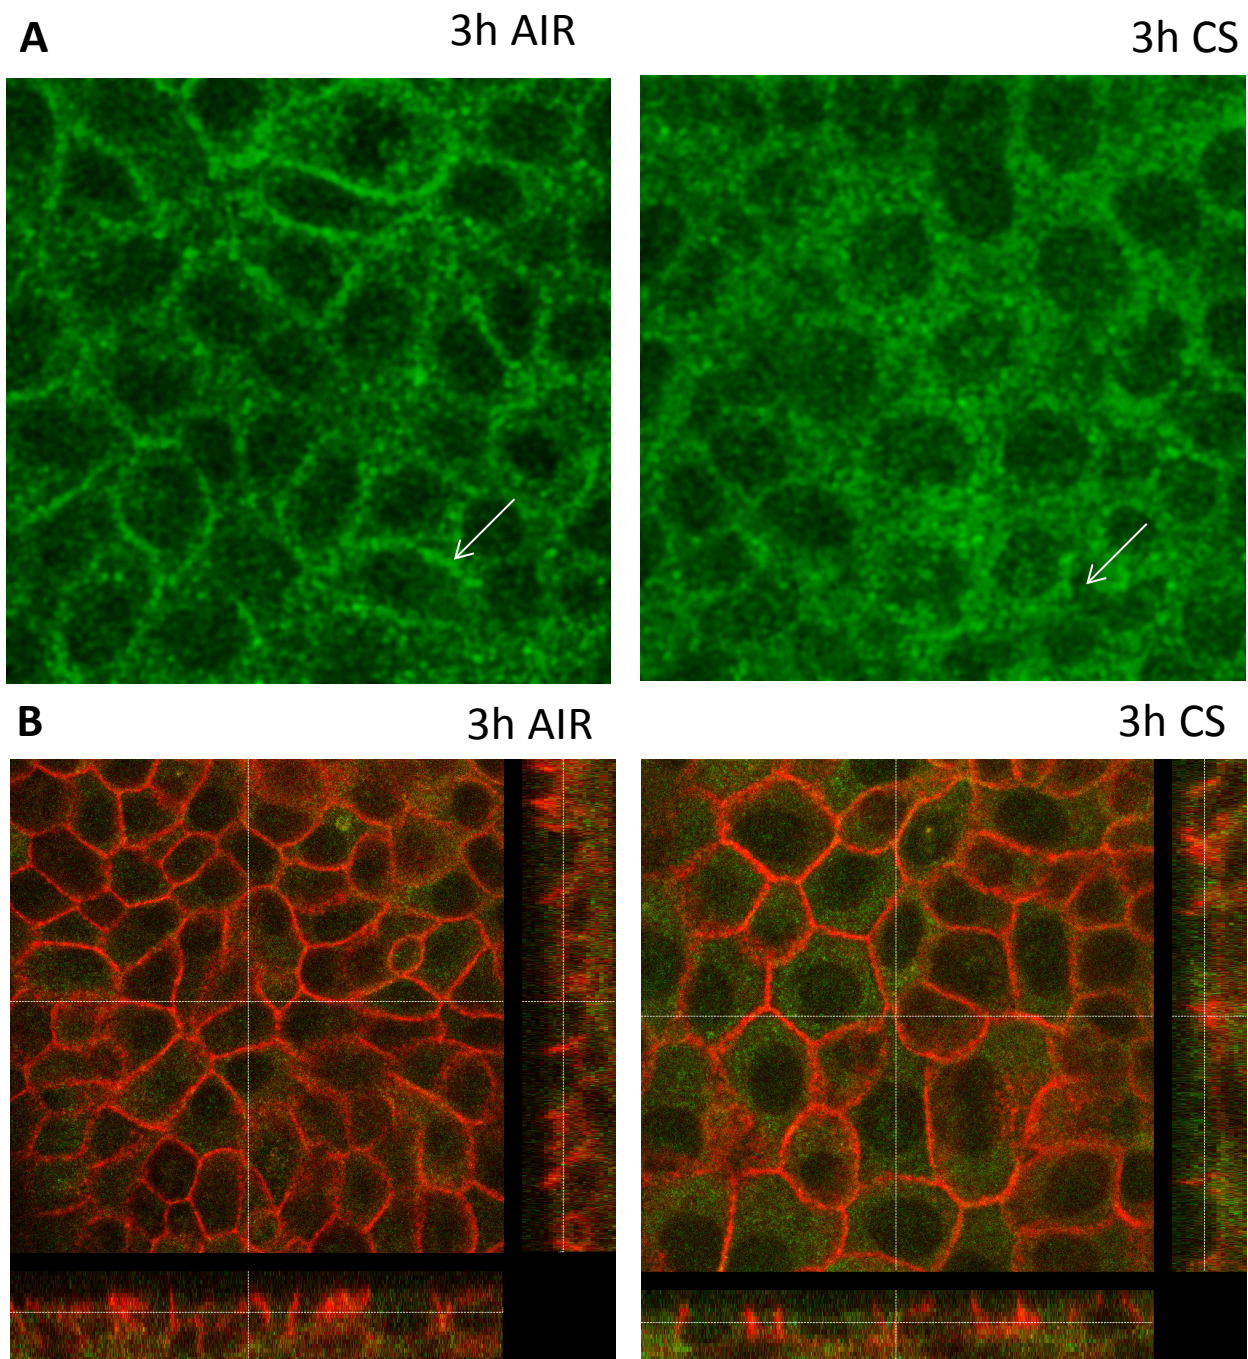

EGFR- green, E-CAD – red; 63x, 1.6 zoom

C

HBEC-ALI 10 minutes Air

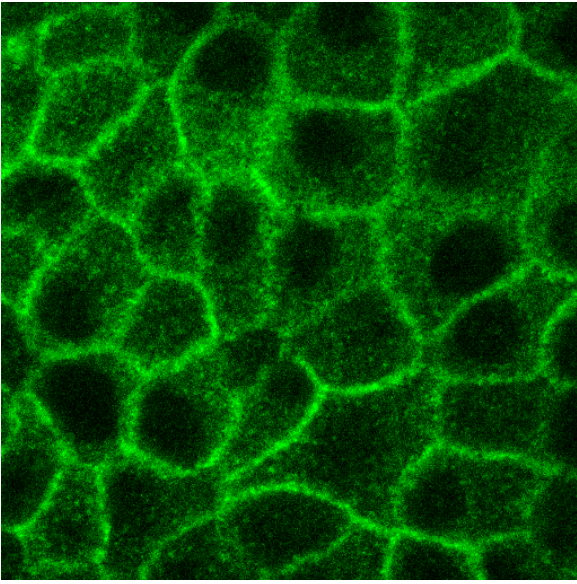

HBEC-ALI 10 minutes

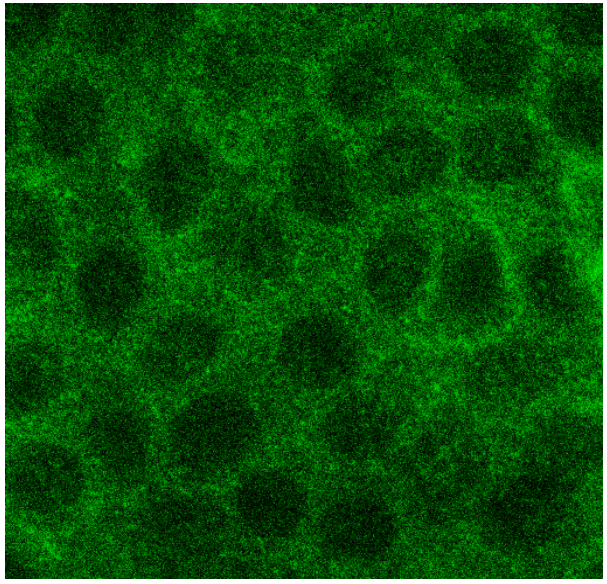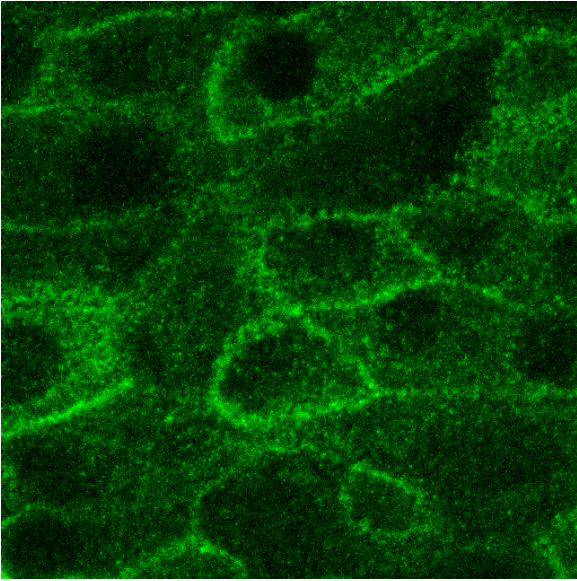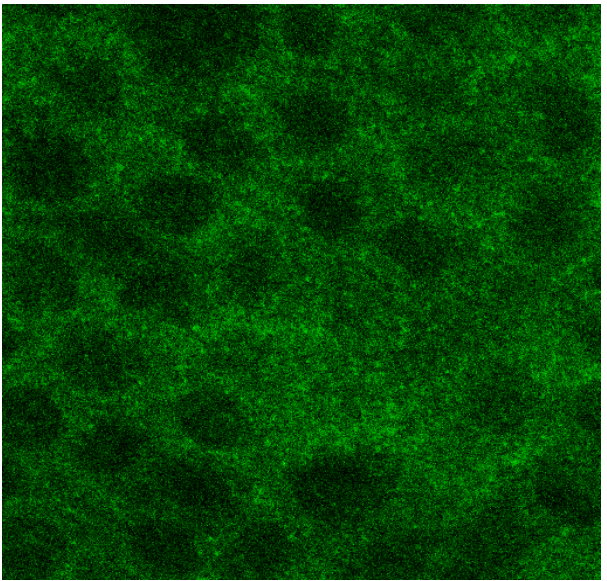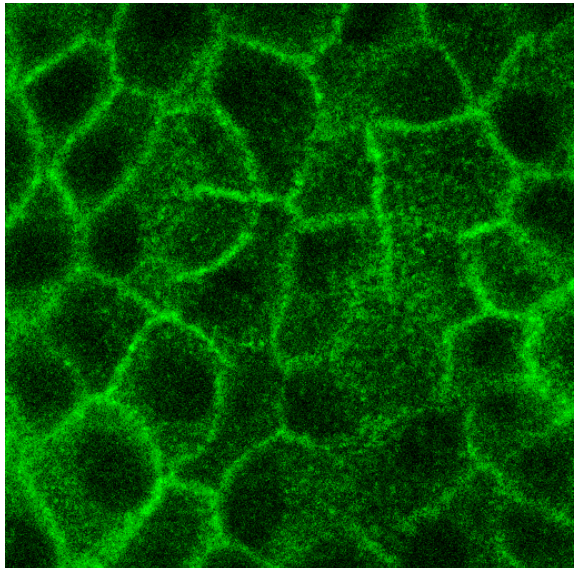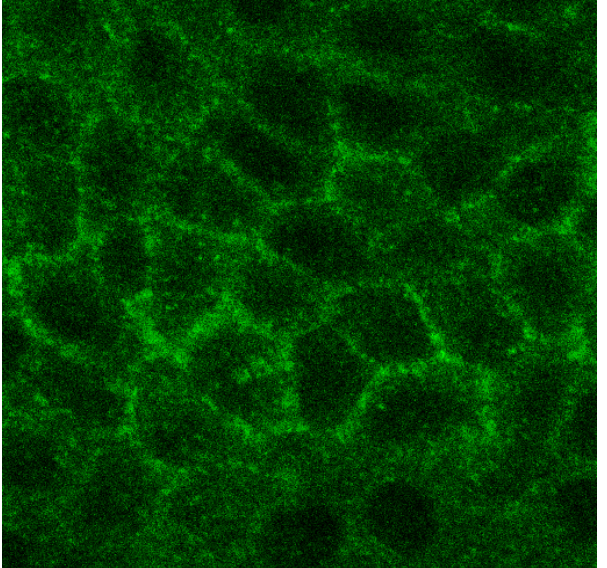

Supplement: PHY2-4-e12878-s002.pdf [file PHY2-4-e12878-s002.pdf]
